# Supplementary material
Source: HighWire-hosted journal article supplement (http://dmd.aspetjournals.org/highwire/filestream/79758/field_highwire_adjunct_files/6/1087_supp_table3.pdf)
Supplement: 1087_supp_table3.pdf [file 1087_supp_table3.pdf]

## Metabolic disposition of triazolam and clobazam in humanized CYP3A mice with a double knockout background of mouse *Cyp2c* and *Cyp3a* genes

Kaoru Kobayashi, Genki Minegishi, Nina Kuriyama, Atsushi Miyajima, Satoshi Abe, Kanako Kazuki, Yasuhiro Kazuki

Drug Metabolism and Disposition

Manuscript Number: DMD-AR-2022-001087

Supplemental Table 3. Conditions used for LC-MS/MS analysis.

The LC-MS/MS system consisted of either Shimadzu LCMS8050 equipped with Nexera series HPLC system (System 1) or SCIEX QTRAP4500 equipped with a Shimadzu Prominence series HPLC system (System 2). Data from System 1 and 2 were processed using Lab Solution software (version 5.97 SP1, Shimadzu) and MultiQuant software (version 1.3, SCIEX), respectively. Mobile phases consisted of 0.1% formic acid in distilled water (Mobile phase 1), 0.1% formic acid in acetonitrile/methanol=1/1 (v/v) (Mobile phase 2), 10% methanol in distilled water (Mobile phase 3) and methanol (Mobile phase 4). The column was a COSMOSIL 3C18-MS-II (2.0 mm x 50 mm; Nacalai Tesque). Temperature of the autosampler and column was maintained at 4°C and 40°C, respectively.

| Sample             | drug                | MRM transition | System | retention time (min) | Flow rate (ml/min)<br>Time; rate | Injection volume (μL) | Mobile phase (A/B) | Gradient condition<br>Time; B concentration                                                               |  |                    |
|--------------------|---------------------|----------------|--------|----------------------|----------------------------------|-----------------------|--------------------|-----------------------------------------------------------------------------------------------------------|--|--------------------|
| incubation mixture | 1'-hydroxytriazolam | 359.3 > 176.1  | 1      | 1.92                 | 0.6                              | 1                     | 1/2                | 0-0.6 min; 15%<br>0.6-2.0 min; 15%→90%<br>2.0-3.8 min; 90%<br>3.8-3.81 min; 90%→15%<br>3.81-4.51 min; 15% |  |                    |
|                    | 4-hydroxytriazolam  | 359.3 > 314.0  |        | 1.93                 |                                  |                       |                    |                                                                                                           |  |                    |
|                    | propranolol         | 260.1 > 116.2  |        | 1.59                 |                                  |                       |                    |                                                                                                           |  |                    |
| plasma             | triazolam           | 343.0 > 308.1  | 2      | 2.40                 |                                  | 5                     |                    |                                                                                                           |  | 0-2.0 min; 15%→90% |
|                    | 1'-hydroxytriazolam | 359.0 > 175.9  |        | 2.31                 |                                  |                       |                    |                                                                                                           |  | 2.0-3.7 min; 90%   |

|        |                    |               |   |      |                                        |   |     |                       |
|--------|--------------------|---------------|---|------|----------------------------------------|---|-----|-----------------------|
|        | 4-hydroxytriazolam | 359.0 > 313.9 |   | 2.32 |                                        |   |     | 3.7-3.71 min; 90%→15% |
|        | propranolol        | 260.1 > 116.0 |   | 1.89 |                                        |   |     | 3.71-5.0 min; 15%     |
| plasma | CLB                | 301.1 > 259.3 | 1 | 3.30 | 0-2.4 min; 0.4→0.6<br>2.4-7.5 min; 0.6 | 2 | 3/4 | 0-1.0 min; 5%         |
|        | NCLB               | 287.1 > 245.2 |   | 3.23 |                                        |   |     | 1.0-2.4 min; 5%→98%   |
|        | oxazepam           | 287.1 > 241.2 |   | 3.35 |                                        |   |     | 2.4-7.0 min; 98%      |
|        |                    |               |   |      |                                        |   |     | 7.0-7.01 min; 98%→5%  |
|        |                    |               |   |      |                                        |   |     | 7.01-7.5 min; 5%      |
